# Supplementary material
Source: publisher figshare collection journal article supplement (https://karger.figshare.com/ndownloader/files/38310765)
Supplement: Supplementary file 1 [file 38310765]

Supplement Table III. Unadjusted logistic regression analysis of kidney recovery (≥50% sCr decrease) and logistic regression following conditional backward selection

|  | Unadjusted logistic regression  (≥50% s-Cr decrease) | | | Conditional backward selection  (≥50% s-Cr decrease) | | |
| --- | --- | --- | --- | --- | --- | --- |
|  | *p* | OR  unadjusted | 95% CI | *p* | OR  adjusted | 95% CI |
| Age  (years) | NS | 1.003 | 0.997- 1.009 | - | - | - |
| Female sex | NS | 1.138 | 0.933- 1.388 | <0.001 | 1.732 | 1.300-2.307 |
| BMI  (kg/m2) | NS | 0.984 | 0.965- 1.003 | <0.05 | 0.970 | 0.947-0.993 |
| s-Cr admission  (µmol/l) | <0.001 | 1.002 | 1.002- 1.002 | <0.001 | 1.003 | 1.002-1.004 |
| Hemoglobin  (g/l) | <0.001 | 1.008 | 1.004- 1.012 | <0.001 | 1.022 | 1.015-1.029 |
| Leukocyte count (x109/l) | <0.01 | 1.017 | 1.005-1.030 | - | - | - |
| CRP  (mg/l) | <0.001 | 1.003 | 1.002-1.004 | <0.001 | 1.003 | 1.001-1.004 |
| Potassium  (mmol/l) | 0.051 | 1.117 | 1.000- 1.249 | - | - | - |
| Albumin  (g/l) | NS | 0.989 | 0.937-1.006 | <0.01 | 0.966 | 0.942-0.991 |
| St-bicarbonate  (mmol/l) | <0.01 | 0.958 | 0.933- 0.985 | - | - | - |
| ACR  (mg/mmol) | <0.001 | 0.998 | 0.997-0.999 | <0.001 | 0.998 | 0.997-0.999 |
| AKI stage 1 | *Ref* | | | | | |
| AKI stage 2 | <0.001 | 3.287 | 2.253-4.795 | <0.001 | 3.384 | 2.051-5.582 |
| AKI stage 3 | NS | 0.881 | 0.674-1.153 | NS | 0.755 | 0.522-1.091 |
